# Supplementary material for: Surface-specific vibrational spectroscopy of the water/silica interface: screening and interference
Source: Royal Society of Chemistry journal article supplement (doi:10.1039/c7cp02251d), 2017-01-01
Supplement: c7cp02251d1.pdf [file c7cp02251d1.pdf]

## Supporting Information

### **Surface-Specific Vibrational Spectroscopy of the Water/Silica Interface: Screening and Interference**

*Jan Schaefer, Grazia Gonella, Mischa Bonn and Ellen H. G. Backus\**

*\*corresponding author: [backus@mpip-mainz.mpg.de](mailto:backus@mpip-mainz.mpg.de)*

Max Planck Institute for Polymer Research, Ackermannweg 10, 55128, Mainz, Germany

## S1. Normalized SFG spectra of water at the silica surface

In the manuscript, we show the raw SFG spectra taken from the silica/water interface. For comparison, Figure S1 presents the same spectra shown in Figure 1, after normalization by the non-resonant signal from a chromium-free gold coated silica window. The double feature in the O-H stretch region reported previously<sup>1</sup> is reproduced.

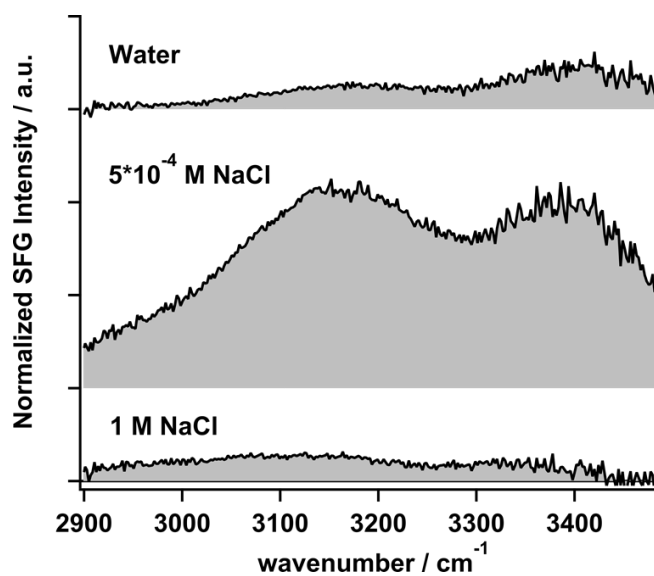

Figure S1: Normalized SFG spectra of the silica / water interface obtained from the raw data shown in Figure 1, normalized by the non-resonant signal from a chromium-free gold coated silica window

## S2. Expression for the potential, Debye length and wave-vector mismatch

Based on the previously reported theoretical model<sup>2</sup>, we determined the ratios between the non-linear susceptibilities  $\chi^{(3)}/\chi^{(2)}$ . For a 1:1 electrolyte solution, the explicit definitions of the surface potential  $\phi_0$ , Debye length  $\kappa$  and wave vector  $\Delta k_z$  are given in equation S1-S3.

$$\phi_0(c) = \frac{2k_B T}{e_c} \sinh^{-1} \left( \frac{\sigma_0}{\sqrt{8000k_B T N_A c \epsilon_0 \epsilon_r}} \right) \quad (\text{S1})$$

$$\kappa(c) = \sqrt{\frac{2000e_c^2 N_A c}{\epsilon_0 \epsilon_r k_B T}} \quad (\text{S2})$$

$$\Delta k_z = \frac{\sqrt{n_{SFG}^2 - \sin^2(\theta_{SFG})}}{\omega_{SFG}} + \frac{\sqrt{n_{VIS}^2 - \sin^2(\theta_{VIS})}}{\omega_{VIS}} + \frac{\sqrt{n_{IR}^2 - \sin^2(\theta_{IR})}}{\omega_{IR}} \quad (\text{S3})$$

where  $k_B$  is the Boltzmann constant,  $T$  the temperature,  $e_c$  the elementary charge,  $\sigma_0$  the surface charge density,  $N_A$  Avogadro's number,  $c$  the electrolyte concentration,  $\epsilon_0$  the vacuum permittivity,  $\epsilon_r$  the relative permittivity of water,  $n_i$  the refractive index,  $\omega_i$  the frequency and  $\theta_i$  the angle between the beam and the surface normal.

### S3. Uncertainty on the non-linear susceptibility ratio

Surface charge densities,  $\sigma_0$ , as reported for silica around neutral pH silica are  $-0.06 \text{ C/m}^2 < \sigma_0 < -0.02 \text{ C/m}^2$ .<sup>3-7</sup> Here, we compare the effect of the different values of  $\sigma_0$  on the shape of the SFG intensity and obtain for the  $\chi^{(3)}/\chi^{(2)}$  values ranging from  $-16.50 \text{ V}^{-1}$  to  $-22.25 \text{ V}^{-1}$ . The resulting curves are shown in Figure S2

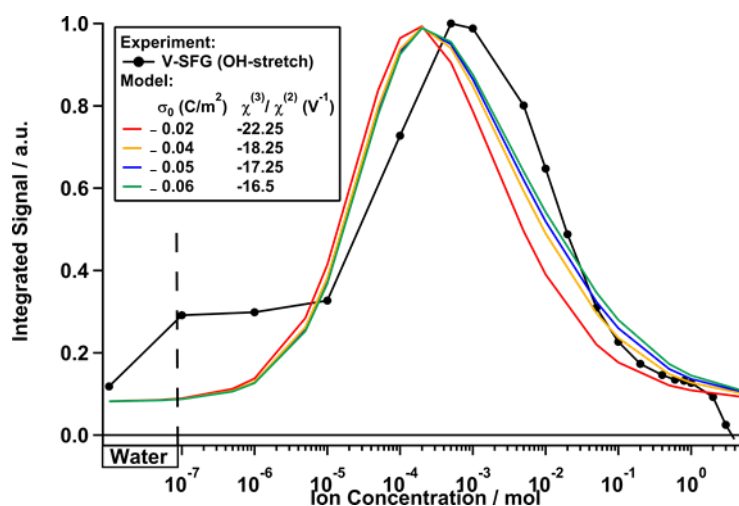

Figure S2: Intensity curves resulting from equation 4, assuming different surface charge densities  $\sigma_0$  and adjusting the  $\chi^{(3)}/\chi^{(2)}$ , compared to the experimental data for solutions with varying NaCl concentrations.

## References

- S1. Ostroverkhov, V.; Waychunas, G. A.; Shen, Y. R., Vibrational Spectra of Water at Water/ $\alpha$ -Quartz (0001) Interface. *Chem. Phys. Lett.* **2004**, *386*, 144-148.
- S2. Gonella, G.; Lütgebaucks, C.; de Beer, A. G.; Roke, S., Second Harmonic and Sum-Frequency Generation from Aqueous Interfaces Is Modulated by Interference. *J. Phys. Chem. C* **2016**, *120*, 9165-9173.
- S3. Karlsson, M.; Craven, C.; Dove, P. M.; Casey, W. H., Surface Charge Concentrations on Silica in Different 1.0 M Metal-Chloride Background Electrolytes and Implications for Dissolution Rates. *Aquat. Geochem.* **2001**, *7*, 13-32.
- S4. Brown, M. A.; Goel, A.; Abbas, Z., Effect of Electrolyte Concentration on the Stern Layer Thickness at a Charged Interface. *Angew. Chem. Int. Edit* **2016**, *55*, 3790-3794.
- S5. Darlington, A. M.; Gibbs-Davis, J. M., Bimodal or Trimodal? The Influence of Starting pH on Site Identity and Distribution at the Low Salt Aqueous/Silica Interface. *J. Phys. Chem. C* **2015**, *119*, 16560-16567.
- S6. Behrens, S. H.; Grier, D. G., The Charge of Glass and Silica Surfaces. *J. Chem. Phys.* **2001**, *115*, 6716-6721.
- S7. Wang, M.; Revil, A., Electrochemical Charge of Silica Surfaces at High Ionic Strength in Narrow Channels. *J. Colloid. Interface Sci.* **2010**, *343*, 381-386.
